# Supplementary material for: Measurement report: Characteristics of aminiums in PM 2.5 during winter clean and polluted episodes in China: aminium outbreak and its constraint
Source: Copernicus journal article supplement (doi:10.5194/egusphere-2024-975), 2024-05-03
Supplement: Supplementary file 1 [file egusphere-2024-975-supplement.pdf]

1 **Characteristics of aminiums in PM2.5 during**  
2 **winter clean and polluted episodes in China:**  
3 **aminium outbreak and its constraint**

4

5 Yu Xu<sup>1</sup>, Tang Liu<sup>1</sup>, Yi-Jia Ma<sup>1</sup>, Qi-Bin Sun<sup>2</sup>, Hong-Wei Xiao<sup>1</sup>, Hao Xiao<sup>1</sup>, Hua-Yun  
6 Xiao<sup>1,\*</sup>

7

8 <sup>1</sup>School of Agriculture and Biology, Shanghai Jiao Tong University, Shanghai 200240,  
9 China

10 <sup>2</sup>Dongguan Meteorological Bureau, Dongguan, Guangdong, 523086, China

11

12

13

14

15

\*Corresponding authors

16

Hua-Yun Xiao

17

E-mail: xiaohuayun@sjtu.edu.cn

18

19

20 **Contents of this file**

21 Tables S1 – S4

22 Figures S1 – S5

23

24

25 **Table S1.** Mean values ( $\pm$  SD) of the main parameters observed in different periods and locations.

| Parameters                                                                                                               | Lanzhou (LZ)                              |                     |                     | Taiyuan (TY)                              |                                             |                                             | Haerbin (HEB)                                            |                     |                                             | Beijing (BJ)                                             |                     |                     |
|--------------------------------------------------------------------------------------------------------------------------|-------------------------------------------|---------------------|---------------------|-------------------------------------------|---------------------------------------------|---------------------------------------------|----------------------------------------------------------|---------------------|---------------------------------------------|----------------------------------------------------------|---------------------|---------------------|
|                                                                                                                          | Dec. 2–30, 2017 ( $n = 17$ ) <sup>a</sup> |                     |                     | Dec. 2–30, 2017 ( $n = 15$ ) <sup>a</sup> |                                             |                                             | Dec. 18, 2017 to Jan. 15, 2018 ( $n = 17$ ) <sup>a</sup> |                     |                                             | Dec. 22, 2017 to Jan. 21, 2018 ( $n = 18$ ) <sup>a</sup> |                     |                     |
|                                                                                                                          | Clean day                                 | Polluted day        | Full period         | Clean day                                 | Polluted day                                | Full period                                 | Clean day                                                | Polluted day        | Full period                                 | Clean day                                                | Polluted day        | Full period         |
| PM <sub>2.5</sub> ( $\mu\text{g m}^{-3}$ )                                                                               | 52.33 $\pm$ 13.40                         | 111.75 $\pm$ 19.17  | 80.29 $\pm$ 33.87   | 32.50 $\pm$ 11.37                         | 135.43 $\pm$ 44.91                          | 80.53 $\pm$ 60.39                           | 41.60 $\pm$ 17.35                                        | 133.00 $\pm$ 45.60  | 106.12 $\pm$ 57.36                          | 34.00 $\pm$ 13.90                                        | 115.40 $\pm$ 32.40  | 56.61 $\pm$ 41.90   |
| T ( $^{\circ}\text{C}$ )                                                                                                 | -5.25 $\pm$ 1.72                          | -4.99 $\pm$ 1.10    | -5.13 $\pm$ 1.47    | -4.14 $\pm$ 3.77                          | -3.82 $\pm$ 4.70                            | -3.99 $\pm$ 4.23                            | -12.63 $\pm$ 3.27                                        | -15.43 $\pm$ 3.10   | -14.61 $\pm$ 3.40                           | -6.68 $\pm$ 2.51                                         | -2.68 $\pm$ 3.83    | -3.79 $\pm$ 3.94    |
| RH (%)                                                                                                                   | 52.69 $\pm$ 4.87                          | 53.58 $\pm$ 8.34    | 53.11 $\pm$ 6.74    | 35.45 $\pm$ 2.46                          | 54.86 $\pm$ 13.53                           | 44.51 $\pm$ 13.50                           | 65.78 $\pm$ 4.06                                         | 69.56 $\pm$ 6.16    | 68.45 $\pm$ 5.88                            | 40.43 $\pm$ 5.78                                         | 70.58 $\pm$ 14.07   | 48.80 $\pm$ 16.17   |
| Wind speed ( $\text{m s}^{-1}$ )                                                                                         | 1.64 $\pm$ 0.33                           | 1.63 $\pm$ 0.52     | 1.63 $\pm$ 0.43     | 2.64 $\pm$ 0.62                           | 1.57 $\pm$ 0.71                             | 2.14 $\pm$ 0.85                             | 2.68 $\pm$ 0.56                                          | 2.36 $\pm$ 0.68     | 2.45 $\pm$ 0.67                             | 2.35 $\pm$ 0.94                                          | 1.65 $\pm$ 0.50     | 2.16 $\pm$ 0.90     |
| VC <sup>b</sup> ( $\text{m}^2 \text{s}^{-1}$ )                                                                           | 434.06 $\pm$ 270.98                       | 337.49 $\pm$ 201.57 | 388.61 $\pm$ 245.60 | 1632.49 $\pm$ 951.06                      | 352.14 $\pm$ 247.19                         | 1034.99 $\pm$ 958.60                        | 1253.71 $\pm$ 581.83                                     | 553.49 $\pm$ 268.89 | 759.44 $\pm$ 502.39                         | 760.26 $\pm$ 960.35                                      | 394.85 $\pm$ 367.63 | 658.76 $\pm$ 854.64 |
| PBLH (m)                                                                                                                 | 250.25 $\pm$ 105.49                       | 193.81 $\pm$ 63.06  | 223.69 $\pm$ 92.50  | 571.91 $\pm$ 238.95                       | 212.74 $\pm$ 80.36                          | 404.29 $\pm$ 256.07                         | 452.36 $\pm$ 180.19                                      | 225.09 $\pm$ 75.03  | 291.94 $\pm$ 155.71                         | 268.58 $\pm$ 157.05                                      | 205.93 $\pm$ 119.69 | 251.18 $\pm$ 150.27 |
| Amount of rainfall (mm)                                                                                                  | 0.00 $\pm$ 0.00                           | 0.00 $\pm$ 0.00     | 0.00 $\pm$ 0.00     | 0.00 $\pm$ 0.00                           | 0.07 $\pm$ 0.17<br>( $n = 1$ ) <sup>c</sup> | 0.03 $\pm$ 0.12<br>( $n = 1$ ) <sup>c</sup> | 0.04 $\pm$ 0.08<br>( $n = 1$ ) <sup>c</sup>              | 0.00 $\pm$ 0.00     | 0.01 $\pm$ 0.05<br>( $n = 1$ ) <sup>c</sup> | 0.00 $\pm$ 0.00                                          | 0.00 $\pm$ 0.00     | 0.00 $\pm$ 0.00     |
| SO <sub>2</sub> ( $\mu\text{g m}^{-3}$ )                                                                                 | 44.56 $\pm$ 11.27                         | 68.38 $\pm$ 26.58   | 55.76 $\pm$ 23.26   | 33.75 $\pm$ 23.36                         | 100.43 $\pm$ 18.31                          | 64.87 $\pm$ 39.42                           | 38.00 $\pm$ 8.29                                         | 62.25 $\pm$ 13.91   | 55.12 $\pm$ 16.70                           | 9.08 $\pm$ 3.69                                          | 10.00 $\pm$ 3.90    | 9.33 $\pm$ 3.77     |
| NO <sub>2</sub> ( $\mu\text{g m}^{-3}$ )                                                                                 | 72.56 $\pm$ 16.67                         | 100.63 $\pm$ 22.64  | 85.76 $\pm$ 24.18   | 38.00 $\pm$ 11.65                         | 86.43 $\pm$ 11.10                           | 60.60 $\pm$ 26.71                           | 34.80 $\pm$ 7.98                                         | 60.42 $\pm$ 11.77   | 52.88 $\pm$ 15.90                           | 49.62 $\pm$ 14.45                                        | 73.60 $\pm$ 8.21    | 56.83 $\pm$ 17.25   |
| O <sub>3</sub> ( $\mu\text{g m}^{-3}$ )                                                                                  | 55.44 $\pm$ 11.53                         | 50.00 $\pm$ 8.66    | 52.88 $\pm$ 10.63   | 64.63 $\pm$ 12.19                         | 23.43 $\pm$ 10.63                           | 45.40 $\pm$ 23.55                           | 54.80 $\pm$ 1.94                                         | 39.08 $\pm$ 8.72    | 43.71 $\pm$ 10.30                           | 37.92 $\pm$ 15.31                                        | 22.80 $\pm$ 14.84   | 33.72 $\pm$ 16.63   |
| O <sub>3</sub> ( $\mu\text{g m}^{-3}$ )                                                                                  | 128.00 $\pm$ 12.56                        | 150.63 $\pm$ 25.31  | 138.65 $\pm$ 22.64  | 102.63 $\pm$ 7.31                         | 109.86 $\pm$ 11.01                          | 106.00 $\pm$ 9.91                           | 89.60 $\pm$ 7.36                                         | 99.50 $\pm$ 8.27    | 96.59 $\pm$ 9.20                            | 87.54 $\pm$ 11.47                                        | 96.40 $\pm$ 9.73    | 90.56 $\pm$ 11.55   |
| NO <sub>3</sub> <sup>-</sup> ( $\mu\text{g m}^{-3}$ )                                                                    | 12.93 $\pm$ 6.45                          | 24.73 $\pm$ 12.78   | 18.48 $\pm$ 11.56   | 6.46 $\pm$ 1.83                           | 26.72 $\pm$ 11.53                           | 15.92 $\pm$ 12.89                           | 3.05 $\pm$ 1.78                                          | 10.72 $\pm$ 4.48    | 8.47 $\pm$ 5.23                             | 6.64 $\pm$ 3.87                                          | 27.80 $\pm$ 13.74   | 12.52 $\pm$ 12.37   |
| SO <sub>4</sub> <sup>2-</sup> ( $\mu\text{g m}^{-3}$ )                                                                   | 10.99 $\pm$ 4.84                          | 22.09 $\pm$ 11.76   | 16.21 $\pm$ 10.40   | 9.12 $\pm$ 3.85                           | 30.38 $\pm$ 15.57                           | 19.04 $\pm$ 15.28                           | 5.52 $\pm$ 2.08                                          | 12.67 $\pm$ 5.14    | 10.56 $\pm$ 5.52                            | 3.97 $\pm$ 1.48                                          | 16.00 $\pm$ 7.14    | 7.31 $\pm$ 6.69     |
| NH <sub>4</sub> <sup>+</sup> ( $\mu\text{g m}^{-3}$ )                                                                    | 6.93 $\pm$ 2.81                           | 11.58 $\pm$ 6.01    | 9.11 $\pm$ 5.15     | 6.33 $\pm$ 1.68                           | 22.80 $\pm$ 13.83                           | 14.02 $\pm$ 12.58                           | 3.51 $\pm$ 2.09                                          | 9.73 $\pm$ 3.61     | 7.90 $\pm$ 4.31                             | 4.28 $\pm$ 2.85                                          | 13.75 $\pm$ 10.48   | 6.91 $\pm$ 7.37     |
| K <sup>+</sup> ( $\mu\text{g m}^{-3}$ )                                                                                  | 0.54 $\pm$ 0.23                           | 0.98 $\pm$ 0.40     | 0.75 $\pm$ 0.39     | 0.85 $\pm$ 0.27                           | 2.15 $\pm$ 0.74                             | 1.46 $\pm$ 0.84                             | 0.80 $\pm$ 0.52                                          | 2.28 $\pm$ 0.83     | 1.85 $\pm$ 1.01                             | 0.66 $\pm$ 0.44                                          | 0.90 $\pm$ 0.47     | 0.73 $\pm$ 0.46     |
| ALW ( $\mu\text{g m}^{-3}$ )                                                                                             | 10.84 $\pm$ 7.00                          | 26.29 $\pm$ 15.97   | 18.11 $\pm$ 14.33   | 6.94 $\pm$ 5.86                           | 70.33 $\pm$ 87.02                           | 36.52 $\pm$ 67.47                           | 11.94 $\pm$ 7.67                                         | 41.46 $\pm$ 17.28   | 32.78 $\pm$ 20.22                           | 7.69 $\pm$ 3.29                                          | 109.91 $\pm$ 149.35 | 36.09 $\pm$ 91.10   |
| Total org. acids <sup>d</sup> ( $\mu\text{g m}^{-3}$ )                                                                   | 0.28 $\pm$ 0.37                           | 0.43 $\pm$ 0.47     | 0.35 $\pm$ 0.43     | 0.32 $\pm$ 0.29                           | 1.06 $\pm$ 0.49                             | 0.67 $\pm$ 0.54                             | 0.73 $\pm$ 0.17                                          | 1.32 $\pm$ 0.48     | 1.15 $\pm$ 0.49                             | 0.28 $\pm$ 0.16                                          | 0.85 $\pm$ 0.46     | 0.43 $\pm$ 0.38     |
| (NO <sub>3</sub> <sup>-</sup> + 2SO <sub>4</sub> <sup>2-</sup> - NH <sub>4</sub> <sup>+</sup> ) ( $\mu\text{g m}^{-3}$ ) | 27.97 $\pm$ 13.30                         | 57.34 $\pm$ 24.40   | 47.79 $\pm$ 24.26   | 18.37 $\pm$ 7.67                          | 64.70 $\pm$ 28.15                           | 3.99 $\pm$ 30.58                            | 10.58 $\pm$ 3.95                                         | 26.33 $\pm$ 10.21   | 21.69 $\pm$ 11.58                           | 10.30 $\pm$ 4.93                                         | 46.06 $\pm$ 18.74   | 20.23 $\pm$ 19.28   |
| pH                                                                                                                       | 5.01 $\pm$ 0.17                           | 5.39 $\pm$ 1.01     | 5.19 $\pm$ 0.73     | 6.09 $\pm$ 0.34                           | 5.23 $\pm$ 0.41                             | 5.69 $\pm$ 0.57                             | 3.61 $\pm$ 1.21                                          | 4.62 $\pm$ 0.85     | 4.32 $\pm$ 1.07                             | 5.86 $\pm$ 1.09                                          | 4.03 $\pm$ 0.79     | 5.35 $\pm$ 1.30     |
| DMAH <sup>+</sup> ( $\mu\text{g m}^{-3}$ )                                                                               | 5.70 $\pm$ 1.69                           | 10.42 $\pm$ 5.70    | 7.92 $\pm$ 4.73     | 5.15 $\pm$ 1.44                           | 19.16 $\pm$ 10.44                           | 11.69 $\pm$ 10.04                           | 4.19 $\pm$ 2.10                                          | 11.73 $\pm$ 6.33    | 9.52 $\pm$ 6.43                             | 1.97 $\pm$ 2.01                                          | 2.91 $\pm$ 1.60     | 2.23 $\pm$ 1.95     |
| MMAH <sup>+</sup> ( $\mu\text{g m}^{-3}$ )                                                                               | 7.49 $\pm$ 4.37                           | 12.18 $\pm$ 5.01    | 9.70 $\pm$ 5.23     | 7.90 $\pm$ 2.56                           | 28.04 $\pm$ 14.44                           | 17.30 $\pm$ 14.21                           | 6.23 $\pm$ 3.77                                          | 23.37 $\pm$ 11.85   | 18.33 $\pm$ 12.82                           | 3.66 $\pm$ 3.09                                          | 5.18 $\pm$ 3.14     | 4.08 $\pm$ 3.18     |
| EAH <sup>+</sup> ( $\mu\text{g m}^{-3}$ )                                                                                | 1.46 $\pm$ 1.28                           | 2.80 $\pm$ 1.42     | 2.09 $\pm$ 1.50     | 1.25 $\pm$ 0.95                           | 4.66 $\pm$ 2.29                             | 2.84 $\pm$ 2.41                             | 1.21 $\pm$ 0.87                                          | 2.87 $\pm$ 1.05     | 2.38 $\pm$ 1.26                             | 1.36 $\pm$ 0.64                                          | 1.35 $\pm$ 0.64     | 1.36 $\pm$ 0.86     |
| DEAH <sup>+</sup> ( $\mu\text{g m}^{-3}$ )                                                                               | 1.70 $\pm$ 0.73                           | 2.37 $\pm$ 1.29     | 2.01 $\pm$ 1.09     | 15.05 $\pm$ 9.38                          | 31.27 $\pm$ 20.60                           | 22.62 $\pm$ 17.62                           | 0.14 $\pm$ 0.19                                          | 1.04 $\pm$ 0.90     | 0.77 $\pm$ 0.87                             | 0.35 $\pm$ 0.40                                          | 1.18 $\pm$ 0.64     | 0.58 $\pm$ 0.61     |
| PAH <sup>+</sup> ( $\mu\text{g m}^{-3}$ )                                                                                | 0.27 $\pm$ 0.52                           | 0.74 $\pm$ 0.59     | 0.49 $\pm$ 0.60     | 0.00 $\pm$ 0.00                           | 0.34 $\pm$ 0.26                             | 0.16 $\pm$ 0.25                             | 0.62 $\pm$ 0.32                                          | 0.85 $\pm$ 0.30     | 0.78 $\pm$ 0.32                             | 0.13 $\pm$ 0.27                                          | 0.54 $\pm$ 0.59     | 0.43 $\pm$ 0.55     |
| BAH <sup>+</sup> ( $\mu\text{g m}^{-3}$ )                                                                                | 0.40 $\pm$ 0.53                           | 1.05 $\pm$ 0.73     | 0.71 $\pm$ 0.71     | 0.16 $\pm$ 0.10                           | 0.62 $\pm$ 0.23                             | 0.38 $\pm$ 0.29                             | 1.11 $\pm$ 0.35                                          | 0.94 $\pm$ 0.33     | 1.19 $\pm$ 0.33                             | 0.83 $\pm$ 0.78                                          | 0.60 $\pm$ 0.42     | 0.77 $\pm$ 0.71     |
| PYRH <sup>+</sup> ( $\mu\text{g m}^{-3}$ )                                                                               | 0.72 $\pm$ 0.57                           | 1.40 $\pm$ 0.65     | 1.04 $\pm$ 0.70     | 0.65 $\pm$ 0.48                           | 3.34 $\pm$ 1.23                             | 1.91 $\pm$ 1.62                             | 0.58 $\pm$ 0.22                                          | 1.49 $\pm$ 0.45     | 1.22 $\pm$ 0.58                             | 0.60 $\pm$ 0.58                                          | 0.27 $\pm$ 0.36     | 0.51 $\pm$ 0.55     |
| Total aminiums ( $\mu\text{g m}^{-3}$ )                                                                                  | 17.75 $\pm$ 8.06                          | 30.96 $\pm$ 12.52   | 23.97 $\pm$ 12.32   | 30.17 $\pm$ 12.87                         | 87.45 $\pm$ 42.52                           | 56.90 $\pm$ 41.81                           | 13.90 $\pm$ 6.83                                         | 42.53 $\pm$ 19.92   | 34.11 $\pm$ 21.54                           | 9.31 $\pm$ 8.01                                          | 11.62 $\pm$ 6.50    | 9.95 $\pm$ 7.69     |
| TA/NH <sub>4</sub> <sup>+</sup>                                                                                          | 2.55 $\pm$ 0.53                           | 3.48 $\pm$ 2.97     | 2.99 $\pm$ 2.12     | 4.19 $\pm$ 2.09                           | 4.33 $\pm$ 1.69                             | 4.64 $\pm$ 1.94                             | 4.48 $\pm$ 1.10                                          | 4.53 $\pm$ 2.07     | 4.51 $\pm$ 1.84                             | 2.31 $\pm$ 2.15                                          | 1.65 $\pm$ 2.18     | 2.13 $\pm$ 2.18     |

26 <sup>a</sup>The numbers in parentheses indicate the number of samples.

27 <sup>b</sup>The ventilation coefficient (VC) can be used to characterize the state of atmospheric dilution in pollutant concentrations (Gani et al., 2019). The VC value can be expressed as a product of wind speed and planetary boundary layer height (PBLH).

28 <sup>c</sup>The numbers in parentheses indicate the days of rainfall.

29 <sup>d</sup>It represents the total concentrations of six organic acids including formic acid (HCOO<sup>-</sup>), acetic acid (CH<sub>3</sub>COO<sup>-</sup>), oxalic acid (C<sub>2</sub>O<sub>4</sub><sup>2-</sup>), succinic acid (C<sub>4</sub>H<sub>4</sub>O<sub>4</sub><sup>2-</sup>), methanesulfonic acid (CH<sub>3</sub>SO<sub>3</sub><sup>-</sup>), and glutaric acid (C<sub>5</sub>H<sub>6</sub>O<sub>4</sub><sup>2-</sup>).

32

33 **Table S2.** Mean values ( $\pm$  SD) of the main parameters observed in different periods and locations.

| Parameters                                                                                                  | Xi'an (XA)                                               |                                             |                                             | Wulumuqi (WLMQ)                             | Chengdu (CD)                              |                    |                     | Wuhan (WH)                                |                     |                     |
|-------------------------------------------------------------------------------------------------------------|----------------------------------------------------------|---------------------------------------------|---------------------------------------------|---------------------------------------------|-------------------------------------------|--------------------|---------------------|-------------------------------------------|---------------------|---------------------|
|                                                                                                             | Dec. 22, 2017 to Jan. 20, 2018 ( $n = 29$ ) <sup>a</sup> |                                             |                                             | Mar. 3–28, 2018 ( $n = 14$ ) <sup>a</sup>   | Dec. 1–31, 2017 ( $n = 17$ ) <sup>a</sup> |                    |                     | Dec. 6–29, 2017 ( $n = 15$ ) <sup>a</sup> |                     |                     |
|                                                                                                             | Clean day                                                | Polluted day                                | Full period                                 | Clean day                                   | Clean day                                 | Polluted day       | Full period         | Clean day                                 | Polluted day        | Full period         |
| PM <sub>2.5</sub> ( $\mu\text{g m}^{-3}$ )                                                                  | 51.00 $\pm$ 12.98                                        | 159.40 $\pm$ 60.09                          | 144.45 $\pm$ 67.33                          | 34.07 $\pm$ 18.29                           | 56.86 $\pm$ 12.06                         | 138.70 $\pm$ 29.99 | 105.00 $\pm$ 47.03  | 56.83 $\pm$ 8.59                          | 114.89 $\pm$ 21.98  | 91.67 $\pm$ 33.59   |
| T ( $^{\circ}\text{C}$ )                                                                                    | -2.02 $\pm$ 2.59                                         | -4.17 $\pm$ 1.40                            | -1.68 $\pm$ 2.57                            | 6.81 $\pm$ 4.14                             | 7.26 $\pm$ 3.18                           | 7.78 $\pm$ 2.35    | 7.56 $\pm$ 2.73     | 3.65 $\pm$ 2.75                           | 5.21 $\pm$ 4.60     | 4.59 $\pm$ 4.04     |
| RH (%)                                                                                                      | 47.08 $\pm$ 9.54                                         | 70.98 $\pm$ 14.45                           | 67.68 $\pm$ 16.14                           | 64.08 $\pm$ 12.87                           | 74.30 $\pm$ 6.20                          | 78.95 $\pm$ 6.25   | 77.04 $\pm$ 6.64    | 61.67 $\pm$ 19.52                         | 64.23 $\pm$ 12.08   | 63.21 $\pm$ 15.54   |
| Wind speed ( $\text{m s}^{-1}$ )                                                                            | 10.14 $\pm$ 2.05                                         | 5.14 $\pm$ 2.35                             | 5.83 $\pm$ 2.89                             | 1.72 $\pm$ 0.48                             | 1.28 $\pm$ 0.45                           | 1.09 $\pm$ 0.21    | 1.17 $\pm$ 0.34     | 2.40 $\pm$ 0.61                           | 1.94 $\pm$ 0.63     | 2.12 $\pm$ 0.66     |
| VC <sup>b</sup> ( $\text{m}^2 \text{s}^{-1}$ )                                                              | 1489.30 $\pm$ 553.62                                     | 826.75 $\pm$ 571.42                         | 918.14 $\pm$ 613.15                         | 396.77 $\pm$ 164.14                         | 483.56 $\pm$ 156.03                       | 296.32 $\pm$ 71.82 | 373.42 $\pm$ 146.80 | 764.58 $\pm$ 384.17                       | 437.39 $\pm$ 244.80 | 568.27 $\pm$ 347.40 |
| PBLH (m)                                                                                                    | 159.45 $\pm$ 73.12                                       | 171.29 $\pm$ 82.64                          | 169.65 $\pm$ 81.49                          | 230.12 $\pm$ 66.52                          | 385.03 $\pm$ 61.64                        | 272.50 $\pm$ 42.69 | 318.84 $\pm$ 75.52  | 315.71 $\pm$ 116.95                       | 214.63 $\pm$ 79.69  | 255.06 $\pm$ 108.32 |
| Amount of rainfall (mm)                                                                                     | 0.00 $\pm$ 0.00                                          | 1.26 $\pm$ 3.07<br>( $n = 5$ ) <sup>c</sup> | 1.09 $\pm$ 2.89<br>( $n = 5$ ) <sup>c</sup> | 0.29 $\pm$ 0.80<br>( $n = 2$ ) <sup>c</sup> | 0.00 $\pm$ 0.00                           | 0.00 $\pm$ 0.00    | 0.00 $\pm$ 0.00     | 0.00 $\pm$ 0.00                           | 0.00 $\pm$ 0.00     | 0.00 $\pm$ 0.00     |
| SO <sub>2</sub> ( $\mu\text{g m}^{-3}$ )                                                                    | 19.75 $\pm$ 1.79                                         | 31.84 $\pm$ 8.83                            | 30.17 $\pm$ 9.22                            | 10.71 $\pm$ 2.86                            | 11.14 $\pm$ 2.17                          | 13.10 $\pm$ 2.07   | 12.29 $\pm$ 2.32    | 12.83 $\pm$ 7.31                          | 18.44 $\pm$ 4.72    | 16.20 $\pm$ 6.50    |
| NO <sub>2</sub> ( $\mu\text{g m}^{-3}$ )                                                                    | 79.24 $\pm$ 23.93                                        | 55.25 $\pm$ 6.91                            | 83.08 $\pm$ 23.45                           | 35.07 $\pm$ 8.77                            | 112.14 $\pm$ 9.45                         | 133.50 $\pm$ 28.38 | 124.71 $\pm$ 24.92  | 57.83 $\pm$ 17.94                         | 84.00 $\pm$ 12.52   | 73.53 $\pm$ 19.67   |
| O <sub>3</sub> ( $\mu\text{g m}^{-3}$ )                                                                     | 38.55 $\pm$ 17.38                                        | 66.75 $\pm$ 6.30                            | 34.04 $\pm$ 14.02                           | 52.29 $\pm$ 9.26                            | 50.86 $\pm$ 12.14                         | 47.60 $\pm$ 19.88  | 48.94 $\pm$ 17.19   | 40.83 $\pm$ 18.90                         | 34.56 $\pm$ 19.56   | 37.07 $\pm$ 19.54   |
| O <sub>x</sub> ( $\mu\text{g m}^{-3}$ )                                                                     | 122.00 $\pm$ 7.04                                        | 117.12 $\pm$ 22.66                          | 117.79 $\pm$ 21.26                          | 87.36 $\pm$ 12.20                           | 112.14 $\pm$ 9.45                         | 133.50 $\pm$ 28.38 | 124.71 $\pm$ 24.92  | 98.67 $\pm$ 34.73                         | 118.56 $\pm$ 21.92  | 110.60 $\pm$ 29.42  |
| NO <sub>3</sub> ( $\mu\text{g m}^{-3}$ )                                                                    | 40.39 $\pm$ 24.31                                        | 9.72 $\pm$ 3.20                             | 36.16 $\pm$ 24.95                           | 6.68 $\pm$ 4.63                             | 11.82 $\pm$ 4.37                          | 33.64 $\pm$ 14.85  | 24.65 $\pm$ 15.90   | 15.72 $\pm$ 8.16                          | 27.88 $\pm$ 10.78   | 23.02 $\pm$ 11.48   |
| SO <sub>4</sub> <sup>2-</sup> ( $\mu\text{g m}^{-3}$ )                                                      | 15.56 $\pm$ 12.13                                        | 25.13 $\pm$ 12.54                           | 23.81 $\pm$ 12.91                           | 6.13 $\pm$ 3.26                             | 6.45 $\pm$ 1.82                           | 16.26 $\pm$ 6.47   | 12.22 $\pm$ 7.02    | 8.59 $\pm$ 2.74                           | 10.39 $\pm$ 3.68    | 9.67 $\pm$ 3.45     |
| NH <sub>4</sub> <sup>+</sup> ( $\mu\text{g m}^{-3}$ )                                                       | 5.18 $\pm$ 1.30                                          | 21.42 $\pm$ 14.12                           | 19.18 $\pm$ 14.27                           | 3.54 $\pm$ 1.71                             | 5.71 $\pm$ 1.96                           | 15.70 $\pm$ 8.80   | 11.59 $\pm$ 8.44    | 7.16 $\pm$ 2.04                           | 9.95 $\pm$ 3.49     | 8.83 $\pm$ 3.29     |
| K <sup>+</sup> ( $\mu\text{g m}^{-3}$ )                                                                     | 0.91 $\pm$ 0.56                                          | 2.13 $\pm$ 1.70                             | 1.96 $\pm$ 1.65                             | 0.16 $\pm$ 0.13                             | 0.92 $\pm$ 0.31                           | 1.67 $\pm$ 0.39    | 1.36 $\pm$ 0.51     | 0.74 $\pm$ 0.29                           | 1.47 $\pm$ 0.53     | 1.18 $\pm$ 0.57     |
| ALW ( $\mu\text{g m}^{-3}$ )                                                                                | 12.80 $\pm$ 10.66                                        | 94.99 $\pm$ 76.11                           | 83.25 $\pm$ 76.21                           | 10.22 $\pm$ 6.25                            | 25.21 $\pm$ 19.67                         | 107.37 $\pm$ 87.24 | 73.54 $\pm$ 79.19   | 34.36 $\pm$ 42.74                         | 37.24 $\pm$ 33.06   | 36.09 $\pm$ 37.26   |
| Total org. acids <sup>d</sup> ( $\mu\text{g m}^{-3}$ )                                                      | 0.87 $\pm$ 0.59                                          | 1.15 $\pm$ 1.23                             | 1.11 $\pm$ 1.17                             | 0.04 $\pm$ 0.03                             | 0.66 $\pm$ 0.33                           | 1.99 $\pm$ 0.86    | 1.45 $\pm$ 0.95     | 0.85 $\pm$ 0.24                           | 1.10 $\pm$ 0.22     | 1.04 $\pm$ 0.29     |
| (NO <sub>3</sub> + 2SO <sub>4</sub> <sup>2-</sup> - NH <sub>4</sub> <sup>+</sup> ) ( $\mu\text{g m}^{-3}$ ) | 69.22 $\pm$ 33.07                                        | 35.66 $\pm$ 26.06                           | 64.59 $\pm$ 34.21                           | 15.34 $\pm$ 8.45                            | 19.01 $\pm$ 5.95                          | 50.46 $\pm$ 17.27  | 37.51 $\pm$ 20.73   | 25.73 $\pm$ 10.18                         | 38.71 $\pm$ 13.72   | 33.52 $\pm$ 13.96   |
| pH                                                                                                          | 5.07 $\pm$ 0.28                                          | 4.37 $\pm$ 0.69                             | 4.46 $\pm$ 0.69                             | 4.31 $\pm$ 1.63                             | 3.45 $\pm$ 0.22                           | 3.31 $\pm$ 0.39    | 3.37 $\pm$ 0.34     | 3.85 $\pm$ 0.99                           | 3.68 $\pm$ 0.62     | 3.75 $\pm$ 0.79     |
| DMAH <sup>+</sup> ( $\mu\text{g m}^{-3}$ )                                                                  | 3.59 $\pm$ 1.54                                          | 6.75 $\pm$ 4.35                             | 6.31 $\pm$ 4.22                             | 1.92 $\pm$ 0.74                             | 7.75 $\pm$ 4.38                           | 15.37 $\pm$ 5.23   | 12.23 $\pm$ 6.16    | 5.43 $\pm$ 1.42                           | 8.01 $\pm$ 2.95     | 6.98 $\pm$ 2.76     |
| MMAH <sup>+</sup> ( $\mu\text{g m}^{-3}$ )                                                                  | 8.74 $\pm$ 3.19                                          | 16.06 $\pm$ 9.53                            | 15.05 $\pm$ 9.28                            | 1.07 $\pm$ 0.55                             | 10.37 $\pm$ 5.79                          | 23.71 $\pm$ 8.02   | 18.22 $\pm$ 9.73    | 8.80 $\pm$ 3.11                           | 15.35 $\pm$ 8.27    | 12.73 $\pm$ 7.43    |
| EAH <sup>+</sup> ( $\mu\text{g m}^{-3}$ )                                                                   | 3.44 $\pm$ 3.01                                          | 1.91 $\pm$ 1.39                             | 2.12 $\pm$ 1.79                             | 0.45 $\pm$ 0.06                             | 6.54 $\pm$ 4.87                           | 17.00 $\pm$ 12.69  | 12.70 $\pm$ 11.45   | 1.99 $\pm$ 1.36                           | 2.03 $\pm$ 1.24     | 2.01 $\pm$ 1.29     |
| DEAH <sup>+</sup> ( $\mu\text{g m}^{-3}$ )                                                                  | 0.84 $\pm$ 0.93                                          | 1.97 $\pm$ 1.54                             | 1.82 $\pm$ 1.52                             | 0.65 $\pm$ 0.21                             | 3.58 $\pm$ 2.66                           | 5.56 $\pm$ 1.91    | 4.75 $\pm$ 2.45     | 1.08 $\pm$ 0.25                           | 1.68 $\pm$ 0.73     | 1.44 $\pm$ 0.65     |
| PAH <sup>+</sup> ( $\mu\text{g m}^{-3}$ )                                                                   | 0.48 $\pm$ 0.28                                          | 0.28 $\pm$ 0.37                             | 0.31 $\pm$ 0.37                             | 0.00 $\pm$ 0.00                             | 0.04 $\pm$ 0.07                           | 0.21 $\pm$ 0.20    | 0.14 $\pm$ 0.18     | 0.04 $\pm$ 0.07                           | 0.02 $\pm$ 0.04     | 0.03 $\pm$ 0.06     |
| BAH <sup>+</sup> ( $\mu\text{g m}^{-3}$ )                                                                   | 1.16 $\pm$ 0.21                                          | 0.86 $\pm$ 0.50                             | 0.90 $\pm$ 0.48                             | 0.07 $\pm$ 0.05                             | 0.25 $\pm$ 0.11                           | 0.40 $\pm$ 0.16    | 0.34 $\pm$ 0.16     | 0.20 $\pm$ 0.07                           | 0.25 $\pm$ 0.09     | 0.23 $\pm$ 0.09     |
| PYRH <sup>+</sup> ( $\mu\text{g m}^{-3}$ )                                                                  | 1.05 $\pm$ 0.08                                          | 1.11 $\pm$ 0.08                             | 1.11 $\pm$ 0.74                             | 0.00 $\pm$ 0.00                             | 1.29 $\pm$ 0.82                           | 2.49 $\pm$ 1.12    | 1.99 $\pm$ 1.16     | 0.64 $\pm$ 0.25                           | 1.29 $\pm$ 0.62     | 1.03 $\pm$ 0.60     |
| Total aminiums ( $\mu\text{g m}^{-3}$ )                                                                     | 19.31 $\pm$ 8.31                                         | 28.95 $\pm$ 16.75                           | 27.62 $\pm$ 16.20                           | 4.16 $\pm$ 1.24                             | 29.83 $\pm$ 16.75                         | 64.73 $\pm$ 20.57  | 50.36 $\pm$ 25.68   | 18.18 $\pm$ 4.86                          | 28.62 $\pm$ 13.09   | 24.44 $\pm$ 11.77   |
| TA/NH <sub>4</sub> <sup>+</sup>                                                                             | 4.07 $\pm$ 2.19                                          | 1.94 $\pm$ 1.56                             | 2.24 $\pm$ 1.82                             | 1.34 $\pm$ 0.54                             | 4.93 $\pm$ 1.44                           | 4.72 $\pm$ 1.36    | 4.81 $\pm$ 1.40     | 3.01 $\pm$ 1.15                           | 2.62 $\pm$ 0.61     | 2.85 $\pm$ 0.99     |

34 <sup>a</sup>The numbers in parentheses indicate the number of samples.

35 <sup>b</sup>The ventilation coefficient (VC) can be used to characterize the state of atmospheric dilution in pollutant concentrations (Gani et al., 2019). The VC value can be expressed as a product of wind speed and planetary boundary layer height (PBLH).

36 <sup>c</sup>The numbers in parentheses indicate the days of rainfall.

37 <sup>d</sup>It represents the total concentrations of six organic acids including formic acid (HCOO<sup>-</sup>), acetic acid (CH<sub>3</sub>COO<sup>-</sup>), oxalic acid (C<sub>2</sub>O<sub>4</sub><sup>2-</sup>), succinic acid (C<sub>4</sub>H<sub>4</sub>O<sub>4</sub><sup>2-</sup>), methanesulfonic acid (CH<sub>3</sub>SO<sub>3</sub><sup>-</sup>), and glutaric acid (C<sub>5</sub>H<sub>6</sub>O<sub>4</sub><sup>2-</sup>).

40 **Table S3.** Mean values ( $\pm$  SD) of the main parameters observed in different periods and locations.

| Parameters                                                                                                               | Hangzhou (HZ)<br>Dec. 4–31, 2017 ( $n = 17$ ) <sup>a</sup> |                                             |                                             | Guangzhou (GZ)<br>Dec. 1–30, 2017 ( $n = 17$ ) <sup>a</sup> |                                             |                                             | Guiyang (GY)<br>Dec. 10, 2017 to Jan. 11, 2018 ( $n = 17$ ) <sup>a</sup> |                     |                                             |
|--------------------------------------------------------------------------------------------------------------------------|------------------------------------------------------------|---------------------------------------------|---------------------------------------------|-------------------------------------------------------------|---------------------------------------------|---------------------------------------------|--------------------------------------------------------------------------|---------------------|---------------------------------------------|
|                                                                                                                          | Clean day                                                  | Polluted day                                | Full period                                 | Clean day                                                   | Polluted day                                | Full period                                 | Clean day                                                                | Polluted day        | Full period                                 |
|                                                                                                                          | PM <sub>2.5</sub> ( $\mu\text{g m}^{-3}$ )                 | 46.38 $\pm$ 13.48                           | 105.11 $\pm$ 30.01                          | 77.47 $\pm$ 37.71                                           | 45.33 $\pm$ 19.01                           | 83.60 $\pm$ 5.31                            | 56.59 $\pm$ 23.82                                                        | 41.47 $\pm$ 14.44   | 100.50 $\pm$ 13.50                          |
| T ( $^{\circ}\text{C}$ )                                                                                                 | 7.38 $\pm$ 3.17                                            | 8.00 $\pm$ 5.43                             | 7.71 $\pm$ 4.52                             | 15.06 $\pm$ 4.28                                            | 18.41 $\pm$ 4.59                            | 16.04 $\pm$ 4.63                            | 4.09 $\pm$ 3.22                                                          | 8.80 $\pm$ 0.30     | 4.65 $\pm$ 3.39                             |
| RH (%)                                                                                                                   | 64.17 $\pm$ 19.25                                          | 69.33 $\pm$ 15.09                           | 66.90 $\pm$ 17.36                           | 63.21 $\pm$ 13.12                                           | 69.53 $\pm$ 6.87                            | 65.07 $\pm$ 11.99                           | 79.95 $\pm$ 13.27                                                        | 60.90 $\pm$ 2.60    | 77.71 $\pm$ 13.92                           |
| Wind speed ( $\text{m s}^{-1}$ )                                                                                         | 2.46 $\pm$ 0.70                                            | 2.19 $\pm$ 0.96                             | 2.32 $\pm$ 0.86                             | 3.69 $\pm$ 1.35                                             | 2.13 $\pm$ 0.62                             | 3.23 $\pm$ 1.38                             | 2.64 $\pm$ 0.53                                                          | 1.58 $\pm$ 0.04     | 2.52 $\pm$ 0.60                             |
| VC <sup>b</sup> ( $\text{m}^2 \text{s}^{-1}$ )                                                                           | 970.49 $\pm$ 568.32                                        | 817.49 $\pm$ 776.37                         | 889.49 $\pm$ 690.60                         | 1703.32 $\pm$ 1018.18                                       | 470.35 $\pm$ 281.24                         | 1340.69 $\pm$ 1034.73                       | 1041.78 $\pm$ 512.05                                                     | 656.11 $\pm$ 158.86 | 996.40 $\pm$ 499.76                         |
| PBLH (m)                                                                                                                 | 310.78 $\pm$ 182.84                                        | 377.66 $\pm$ 128.87                         | 342.26 $\pm$ 163.18                         | 420.39 $\pm$ 141.33                                         | 205.03 $\pm$ 81.28                          | 357.05 $\pm$ 160.22                         | 390.80 $\pm$ 167.15                                                      | 417.31 $\pm$ 111.32 | 393.92 $\pm$ 161.81                         |
| Amount of rainfall (mm)                                                                                                  | 4.50 $\pm$ 7.31<br>( $n = 3$ ) <sup>c</sup>                | 0.98 $\pm$ 2.59<br>( $n = 2$ ) <sup>c</sup> | 2.64 $\pm$ 5.64<br>( $n = 5$ ) <sup>c</sup> | 0.00 $\pm$ 0.00                                             | 0.14 $\pm$ 0.28<br>( $n = 1$ ) <sup>c</sup> | 0.04 $\pm$ 0.16<br>( $n = 1$ ) <sup>c</sup> | 2.01 $\pm$ 5.36<br>( $n = 6$ ) <sup>c</sup>                              | 0.00 $\pm$ 0.00     | 1.77 $\pm$ 5.08<br>( $n = 6$ ) <sup>c</sup> |
| SO <sub>2</sub> ( $\mu\text{g m}^{-3}$ )                                                                                 | 12.13 $\pm$ 3.26                                           | 14.56 $\pm$ 2.99                            | 13.41 $\pm$ 3.34                            | 15.17 $\pm$ 4.49                                            | 23.60 $\pm$ 1.02                            | 17.65 $\pm$ 5.41                            | 30.73 $\pm$ 10.30                                                        | 35.50 $\pm$ 0.50    | 31.29 $\pm$ 9.80                            |
| NO <sub>x</sub> ( $\mu\text{g m}^{-3}$ )                                                                                 | 59.50 $\pm$ 5.48                                           | 73.78 $\pm$ 15.50                           | 67.06 $\pm$ 13.86                           | 64.75 $\pm$ 25.49                                           | 103.80 $\pm$ 15.89                          | 76.24 $\pm$ 29.15                           | 36.93 $\pm$ 17.94                                                        | 79.50 $\pm$ 5.50    | 41.94 $\pm$ 21.81                           |
| O <sub>3</sub> ( $\mu\text{g m}^{-3}$ )                                                                                  | 45.63 $\pm$ 19.33                                          | 49.78 $\pm$ 24.69                           | 47.82 $\pm$ 22.43                           | 71.25 $\pm$ 21.74                                           | 67.40 $\pm$ 31.66                           | 70.12 $\pm$ 25.13                           | 28.53 $\pm$ 17.91                                                        | 36.00 $\pm$ 13.00   | 29.41 $\pm$ 17.57                           |
| O <sub>3</sub> ( $\mu\text{g m}^{-3}$ )                                                                                  | 105.13 $\pm$ 19.61                                         | 123.56 $\pm$ 19.72                          | 114.88 $\pm$ 21.71                          | 136.00 $\pm$ 39.08                                          | 171.20 $\pm$ 32.83                          | 146.35 $\pm$ 40.65                          | 65.47 $\pm$ 24.87                                                        | 115.50 $\pm$ 18.50  | 71.35 $\pm$ 29.09                           |
| NO <sub>2</sub> ( $\mu\text{g m}^{-3}$ )                                                                                 | 12.56 $\pm$ 2.37                                           | 30.94 $\pm$ 9.81                            | 22.29 $\pm$ 11.73                           | 4.39 $\pm$ 2.20                                             | 9.29 $\pm$ 2.87                             | 5.83 $\pm$ 3.29                             | 4.44 $\pm$ 3.05                                                          | 9.21 $\pm$ 3.47     | 5.00 $\pm$ 3.46                             |
| SO <sub>4</sub> <sup>2-</sup> ( $\mu\text{g m}^{-3}$ )                                                                   | 5.37 $\pm$ 1.49                                            | 10.86 $\pm$ 4.12                            | 8.28 $\pm$ 4.19                             | 7.67 $\pm$ 2.73                                             | 12.09 $\pm$ 1.89                            | 8.97 $\pm$ 3.22                             | 7.35 $\pm$ 2.64                                                          | 17.22 $\pm$ 4.60    | 8.51 $\pm$ 4.33                             |
| NH <sub>4</sub> <sup>+</sup> ( $\mu\text{g m}^{-3}$ )                                                                    | 5.55 $\pm$ 0.83                                            | 13.95 $\pm$ 8.36                            | 10.00 $\pm$ 7.41                            | 3.51 $\pm$ 1.27                                             | 6.03 $\pm$ 1.02                             | 4.25 $\pm$ 1.66                             | 3.25 $\pm$ 1.33                                                          | 7.65 $\pm$ 2.55     | 3.77 $\pm$ 2.09                             |
| K <sup>+</sup> ( $\mu\text{g m}^{-3}$ )                                                                                  | 0.63 $\pm$ 0.22                                            | 1.20 $\pm$ 0.23                             | 0.93 $\pm$ 0.36                             | 0.57 $\pm$ 0.28                                             | 1.13 $\pm$ 0.15                             | 0.73 $\pm$ 0.36                             | 0.38 $\pm$ 0.24                                                          | 1.14 $\pm$ 0.18     | 0.47 $\pm$ 0.34                             |
| ALW ( $\mu\text{g m}^{-3}$ )                                                                                             | 45.58 $\pm$ 65.02                                          | 78.22 $\pm$ 89.59                           | 62.86 $\pm$ 80.65                           | 7.34 $\pm$ 5.73                                             | 18.40 $\pm$ 9.42                            | 10.59 $\pm$ 8.64                            | 39.83 $\pm$ 76.00                                                        | 16.77 $\pm$         | 37.12 $\pm$ 71.86                           |
| Total org. acids <sup>d</sup> ( $\mu\text{g m}^{-3}$ )                                                                   | 0.17 $\pm$ 0.10                                            | 0.58 $\pm$ 0.44                             | 0.39 $\pm$ 0.39                             | 0.38 $\pm$ 0.42                                             | 1.11 $\pm$ 0.39                             | 0.59 $\pm$ 0.53                             | 0.46 $\pm$ 0.32                                                          | 1.55 $\pm$ 0.59     | 0.59 $\pm$ 0.51                             |
| (NO <sub>3</sub> <sup>-</sup> + 2SO <sub>4</sub> <sup>2-</sup> ) - NH <sub>4</sub> <sup>+</sup> ( $\mu\text{g m}^{-3}$ ) | 17.76 $\pm$ 2.11                                           | 38.70 $\pm$ 9.83                            | 28.84 $\pm$ 12.75                           | 16.23 $\pm$ 5.41                                            | 27.45 $\pm$ 4.45                            | 19.53 $\pm$ 7.25                            | 15.89 $\pm$ 7.18                                                         | 35.99 $\pm$ 10.11   | 18.25 $\pm$ 9.97                            |
| pH                                                                                                                       | 3.76 $\pm$ 0.45                                            | 3.67 $\pm$ 0.68                             | 3.71 $\pm$ 0.59                             | 2.44 $\pm$ 0.47                                             | 2.35 $\pm$ 0.36                             | 2.41 $\pm$ 0.44                             | 3.22 $\pm$ 0.52                                                          | 3.02 $\pm$ 0.37     | 3.20 $\pm$ 0.51                             |
| DMAH <sup>+</sup> ( $\mu\text{g m}^{-3}$ )                                                                               | 6.71 $\pm$ 5.82                                            | 16.49 $\pm$ 7.39                            | 11.89 $\pm$ 8.29                            | 2.36 $\pm$ 0.94                                             | 6.47 $\pm$ 3.71                             | 3.57 $\pm$ 2.87                             | 6.67 $\pm$ 4.09                                                          | 16.10 $\pm$ 11.30   | 7.78 $\pm$ 6.25                             |
| MMAH <sup>+</sup> ( $\mu\text{g m}^{-3}$ )                                                                               | 7.85 $\pm$ 3.30                                            | 26.62 $\pm$ 11.81                           | 17.79 $\pm$ 12.91                           | 4.94 $\pm$ 2.34                                             | 10.55 $\pm$ 1.80                            | 6.59 $\pm$ 3.37                             | 14.36 $\pm$ 10.99                                                        | 45.75 $\pm$ 29.35   | 18.06 $\pm$ 17.61                           |
| EAH <sup>+</sup> ( $\mu\text{g m}^{-3}$ )                                                                                | 2.17 $\pm$ 1.95                                            | 5.93 $\pm$ 2.60                             | 4.16 $\pm$ 2.98                             | 0.71 $\pm$ 0.42                                             | 0.94 $\pm$ 0.65                             | 0.78 $\pm$ 0.51                             | 2.20 $\pm$ 1.77                                                          | 6.45 $\pm$ 3.75     | 2.70 $\pm$ 2.51                             |
| DEAH <sup>+</sup> ( $\mu\text{g m}^{-3}$ )                                                                               | 2.48 $\pm$ 2.49                                            | 5.79 $\pm$ 2.74                             | 4.23 $\pm$ 3.10                             | 6.86 $\pm$ 4.23                                             | 11.28 $\pm$ 4.09                            | 8.16 $\pm$ 4.65                             | 0.33 $\pm$ 0.47                                                          | 0.35 $\pm$ 0.35     | 0.33 $\pm$ 0.46                             |
| PAH <sup>+</sup> ( $\mu\text{g m}^{-3}$ )                                                                                | 0.16 $\pm$ 0.28                                            | 0.51 $\pm$ 0.46                             | 0.35 $\pm$ 0.42                             | 0.29 $\pm$ 0.30                                             | 0.16 $\pm$ 0.32                             | 0.25 $\pm$ 0.31                             | 0.54 $\pm$ 0.53                                                          | 1.55 $\pm$ 0.65     | 0.66 $\pm$ 0.63                             |
| BAH <sup>+</sup> ( $\mu\text{g m}^{-3}$ )                                                                                | 0.39 $\pm$ 0.40                                            | 0.94 $\pm$ 0.53                             | 0.68 $\pm$ 0.54                             | 0.47 $\pm$ 0.39                                             | 0.34 $\pm$ 0.34                             | 0.43 $\pm$ 0.38                             | 0.88 $\pm$ 0.44                                                          | 1.40 $\pm$ 0.30     | 0.94 $\pm$ 0.46                             |
| PYRH <sup>+</sup> ( $\mu\text{g m}^{-3}$ )                                                                               | 0.45 $\pm$ 0.35                                            | 1.48 $\pm$ 0.53                             | 0.99 $\pm$ 0.69                             | 0.36 $\pm$ 0.39                                             | 0.84 $\pm$ 0.40                             | 0.50 $\pm$ 0.45                             | 1.72 $\pm$ 1.23                                                          | 4.65 $\pm$ 3.05     | 2.06 $\pm$ 1.82                             |
| Total aminiums ( $\mu\text{g m}^{-3}$ )                                                                                  | 20.22 $\pm$ 11.75                                          | 57.75 $\pm$ 23.86                           | 40.09 $\pm$ 26.78                           | 16.00 $\pm$ 6.37                                            | 30.57 $\pm$ 9.22                            | 20.29 $\pm$ 9.89                            | 26.71 $\pm$ 18.36                                                        | 76.25 $\pm$ 48.75   | 32.53 $\pm$ 28.84                           |
| TA/NH <sub>4</sub> <sup>+</sup>                                                                                          | 3.52 $\pm$ 1.62                                            | 4.54 $\pm$ 1.66                             | 4.06 $\pm$ 1.72                             | 5.07 $\pm$ 2.60                                             | 5.12 $\pm$ 1.42                             | 5.09 $\pm$ 2.32                             | 8.37 $\pm$ 4.12                                                          | 8.82 $\pm$ 3.43     | 8.43 $\pm$ 4.04                             |

41 <sup>a</sup>The numbers in parentheses indicate the number of samples.

42 <sup>b</sup>The ventilation coefficient (VC) can be used to characterize the state of atmospheric dilution in pollutant concentrations (Gani et al., 2019). The VC value can be expressed as a product of wind speed and planetary boundary layer height (PBLH).

43 <sup>c</sup>The numbers in parentheses indicate the days of rainfall.

44 <sup>d</sup>It represents the total concentrations of six organic acids including formic acid (HCOO<sup>-</sup>), acetic acid (CH<sub>3</sub>COO<sup>-</sup>), oxalic acid (C<sub>2</sub>O<sub>4</sub><sup>2-</sup>), succinic acid (C<sub>4</sub>H<sub>4</sub>O<sub>4</sub><sup>2-</sup>), methanesulfonic acid (CH<sub>3</sub>SO<sub>3</sub><sup>-</sup>), and glutaric acid (C<sub>5</sub>H<sub>6</sub>O<sub>4</sub><sup>2-</sup>).

47

**Table S4.** Mean mass concentrations of various aminiums in PM<sub>2.5</sub> or cloud water in different seasons and locations.

| Type of site    | Research area     | Year      | Period | DMAH <sup>+</sup><br>(ng m <sup>-3</sup> ) | MMAH <sup>+</sup><br>(ng m <sup>-3</sup> ) | EAH <sup>+</sup><br>(ng m <sup>-3</sup> ) | DEAH <sup>+</sup><br>(ng m <sup>-3</sup> ) | Other aminiums <sup>a</sup><br>(ng m <sup>-3</sup> ) | Total aminiums<br>(ng m <sup>-3</sup> ) | Reference            |
|-----------------|-------------------|-----------|--------|--------------------------------------------|--------------------------------------------|-------------------------------------------|--------------------------------------------|------------------------------------------------------|-----------------------------------------|----------------------|
| Urban           | Guangzhou (China) | 2020      | Summer | 15.6                                       | 29.1                                       | 6.5                                       | 40.6                                       | 19.5                                                 | 111.3                                   | (Chen et al., 2022b) |
|                 | Guangzhou (China) | 2018      | Autumn | 49.0                                       | 243.0                                      | –                                         | 1.0                                        | 4.0                                                  | 297.0                                   | (Huang et al., 2022) |
|                 | Guangzhou (China) | 2015–2016 | Winter | 28.6                                       | 40.4                                       | 2.7                                       | 7.0                                        | 41.3                                                 | 120                                     | (Liu et al., 2022a)  |
|                 | Guangzhou (China) | 2017–2018 | Winter | 3.4                                        | 6.3                                        | 1.3                                       | 10.2                                       | 2.2                                                  | 23.4                                    | (Liu et al., 2023)   |
|                 | Xiamen (China)    | 2013      | Winter | 1.7                                        | 10.2                                       | 5.3                                       | 0.9                                        | 35.6                                                 | 53.7                                    | (Ho et al., 2016)    |
|                 | Hong Kong (China) | 2013      | Winter | 1.5                                        | 12.1                                       | 4.5                                       | 0.9                                        | 26.7                                                 | 45.7                                    | (Ho et al., 2016)    |
|                 | Shanghai (China)  | 2013      | Summer | 15.7                                       | 8.9                                        | 11.5                                      | 38.8 <sup>c</sup>                          | 0                                                    | 74.9                                    | (Tao et al., 2016)   |
|                 | Shanghai (China)  | 2013      | Summer | –                                          | 2.4                                        | 0.2                                       | –                                          | 2.2                                                  | 4.8                                     | (Huang et al., 2016) |
|                 |                   |           | Winter | –                                          | 3.9                                        | 0.3                                       | –                                          | 3.8                                                  | 8.0                                     |                      |
|                 | Shanghai (China)  | 2013      | Spring | 6.4                                        | –                                          | –                                         | 4.8                                        | 8.4                                                  | 19.6                                    | (Zhou et al., 2019)  |
|                 |                   |           | Summer | 9.1                                        | –                                          | –                                         | 1.7                                        | 0.9                                                  | 11.7                                    |                      |
|                 |                   |           | Autumn | 15.5                                       | –                                          | –                                         | 2.8                                        | 12.7                                                 | 31.0                                    |                      |
|                 |                   |           | Winter | 27.3                                       | –                                          | –                                         | 7.3                                        | 35.2                                                 | 69.8                                    |                      |
|                 | Shanghai (China)  | 2017–2018 | Winter | 8.6                                        | 16.0                                       | 4.0                                       | 3.7                                        | 3.5                                                  | 35.8                                    | (Liu et al., 2023)   |
|                 | Yangzhou (China)  | 2016      | Summer | 3.6                                        | 1.4                                        | 12.6                                      | –                                          | 0                                                    | 17.6                                    | (Cheng et al., 2020) |
|                 | Yangzhou (China)  | 2015–2016 | Winter | 4.3                                        | 4.9                                        | 15.4                                      | –                                          | 0                                                    | 24.6                                    | (Shen et al., 2017)  |
|                 | Nanjing (China)   | 2017–2018 | Winter | 5.1                                        | 6.6                                        | 3.5                                       | 1.7                                        | 2.4                                                  | 19.3                                    | (Liu et al., 2023)   |
|                 | Nanjing (China)   | 2016      | Spring | 4.2                                        | 7.6                                        | 21.7                                      | –                                          | 0                                                    | 33.5                                    |                      |
|                 | Nanjing (China)   | 2001      | Spring | –                                          | 12.5                                       | 6.7                                       | –                                          | 4.0                                                  | 23.2                                    | (Yang et al., 2005)  |
|                 |                   |           | Autumn | –                                          | 5.5                                        | 3.7                                       | –                                          | 1.7                                                  | 10.9                                    |                      |
| Seoul (Korea)   | 2018              | Spring    | 2.8    | –                                          | 0.3                                        | 1.4                                       | 1.3                                        | 5.8                                                  | (Choi et al., 2020)                     |                      |
|                 |                   | Summer    | 3.4    | –                                          | 0.4                                        | 1.2                                       | 0.8                                        | 5.8                                                  |                                         |                      |
|                 |                   | Autumn    | 2.6    | –                                          | 0.3                                        | 1.3                                       | 0.9                                        | 5.1                                                  |                                         |                      |
|                 |                   | Winter    | 2.3    | –                                          | 0.1                                        | 1.4                                       | 1.9                                        | 5.7                                                  |                                         |                      |
|                 |                   | Annual    | 2.7    | –                                          | 0.3                                        | 1.3                                       | 1.3                                        | 5.6                                                  |                                         |                      |
| Beijing (China) | 2013              | Winter    | 4.3    | 31.0                                       | 14.8                                       | 2.1                                       | 81.0                                       | 133.2                                                | (Ho et al., 2016)                       |                      |
| Xi'an (China)   | 2017–2018         | Winter    | 5.0    | 13.2                                       | 2.4                                        | 1.2                                       | 3.6                                        | 25.4                                                 | (Liu et al., 2023)                      |                      |
| Xi'an (China)   | 2013              | Winter    | 3.8    | 24.7                                       | 12.6                                       | 2.0                                       | 62.2                                       | 105.3                                                | (Ho et al., 2016)                       |                      |

|                                 |                                                                      |           |                   |                |       |       |                   |       |                          |                           |
|---------------------------------|----------------------------------------------------------------------|-----------|-------------------|----------------|-------|-------|-------------------|-------|--------------------------|---------------------------|
|                                 | Xi'an (China)                                                        | 2008–2009 | Spring            | – <sup>b</sup> | 16.9  | 9.7   | –                 | 6.0   | 32.6                     | (Ho et al., 2015)         |
|                                 |                                                                      |           | Summer            | –              | 6.2   | 3.8   | –                 | 1.6   | 11.6                     |                           |
|                                 |                                                                      |           | Autumn            | –              | 14.7  | 8.4   | –                 | 4.5   | 27.6                     |                           |
|                                 |                                                                      |           | Winter            | –              | 22.3  | 11.5  | –                 | 6.8   | 40.6                     |                           |
| Suburban                        | Shanghai (China)                                                     | 2018      | Summer            | 6.3            | 15.0  | –     | 20.4              | 3.9   | 45.6                     | (Du et al., 2021)         |
|                                 | Guangzhou (China)                                                    | 2021      | Winter            | 4.8            | 11.3  | 6.2   | 7.4               | 22.7  | 52.4                     | (Shu et al., 2023)        |
|                                 | Xuzhou (China)                                                       | 2015–2016 | Winter            | 12.7           | 111.0 | 112.0 | 8.5 <sup>c</sup>  | 4.8   | 249.0                    | (Yang et al., 2023)       |
|                                 |                                                                      |           | Spring            | 15.2           | 109.0 | 41.0  | 10.5 <sup>c</sup> | 16.7  | 192.4                    |                           |
|                                 |                                                                      |           | Summer            | 16.2           | 49.7  | 14.7  | 11.3 <sup>c</sup> | 22.8  | 114.7                    |                           |
|                                 |                                                                      |           | Autumn            | 13.9           | 53.0  | 14.3  | 6.9 <sup>c</sup>  | 15.6  | 103.7                    |                           |
|                                 |                                                                      |           | Annual            | 14.6           | 80.8  | 52.0  | 9.7 <sup>c</sup>  | 14.9  | 172.0                    |                           |
| Beijing (China)                 | 2017                                                                 | Winter    | 1.2               | 23.3           | 11.1  | 0.4   | 8.9               | 44.9  | (Wang et al., 2022)      |                           |
| Rural                           | Guiyang, puding (China)                                              | 2017–2018 | Winter            | 8.8            | 20.6  | 3.2   | 0.1               | 4.5   | 37.2                     | (Liu et al., 2023)        |
|                                 | Baoding (China)                                                      | 2019–2020 | Winter            | 59.6           | 20.4  | –     | 79.1              | 170.7 | 329.8                    | (Feng et al., 2022)       |
|                                 | Egbert (Canada)                                                      | 2010      | Autumn            | 0.1            | –     | –     | 1.0 <sup>c</sup>  | 0     | 1.1                      | (Vandenboer et al., 2012) |
| Forest                          | Nanling (China)                                                      | 2016–2017 | Summer            | 5.0            | 11.9  | –     | 1.7               | 2.1   | 20.7                     | (Liu et al., 2018)        |
|                                 |                                                                      |           | Autumn            | 2.4            | 8.8   | –     | 1.1               | 0.1   | 12.4                     |                           |
| Coastal, Marine, or polar areas | Qingdao (China)                                                      | 2018      | Winter            | 58.7           | 8.5   | 2.7   | 8.4               | 52.4  | 130.7                    | (Liu et al., 2022b)       |
|                                 |                                                                      | 2019      | Winter            | 86.3           | 6.9   | 2.4   | 8.7               | 28.6  | 132.9                    |                           |
|                                 | Zonguldak (Turkey)                                                   | 2006–2007 | Winter            | 4.6            | 4.5   | 4.4   | 4.2               | 102.1 | 119.8                    | (Akyüz, 2008)             |
|                                 |                                                                      |           | Summer            | 2.8            | 2.3   | 2.2   | 2.8               | 66.6  | 76.7                     |                           |
|                                 | Huaniao Island (China)                                               | 2016      | Summer            | 4.0            | –     | –     | 8.7 <sup>c</sup>  | 0     | 12.7                     | (Zhou et al., 2019)       |
|                                 | The coastline of the East China Sea, South China Sea, and Yellow Sea | 2018      | Spring            | 30.1           | –     | –     | –                 | –     | –                        | (Chen et al., 2022a)      |
|                                 | Northwest Atlantic                                                   | 2020      | Winter (non-cold) | 3.91           | –     | –     | –                 | –     | –                        | (Corral et al., 2022)     |
|                                 |                                                                      |           | Winter (cold)     | 7.39           | –     | –     | –                 | –     | –                        |                           |
|                                 |                                                                      |           | Summer            | 0.63           | –     | –     | –                 | –     | –                        |                           |
|                                 | South of the southern boundary of the Antarctic Circumpolar Current  | 2015      | Winter            | 2.02           | 0.34  | 0.12  | 3.84              | 0.81  | 7.13                     | (Dall'osto et al., 2019)  |
| North of the southern           | 2015                                                                 | Winter    | 0.7               | 0.05           | 0.01  | 0.61  | 0.12              | 1.49  | (Dall'osto et al., 2019) |                           |

|                                                  |  |  |  |  |  |  |  |  |  |
|--------------------------------------------------|--|--|--|--|--|--|--|--|--|
| boundary of the Antarctic<br>Circumpolar Current |  |  |  |  |  |  |  |  |  |
|--------------------------------------------------|--|--|--|--|--|--|--|--|--|

49 <sup>a</sup>It indicates the total concentrations of other aminiums including triethylaminium (TEAH<sup>+</sup>), PAH<sup>+</sup>, BAH<sup>+</sup>, PYRH<sup>+</sup>, morpholine (MORH<sup>+</sup>), or  
50 monoethanolaminium (MEOH<sup>+</sup>).

51 <sup>b</sup>The symbol “-” indicates no data.

52 <sup>c</sup>It indicates the sum of TMAH<sup>+</sup> and DEAH<sup>+</sup> concentrations.

53

54



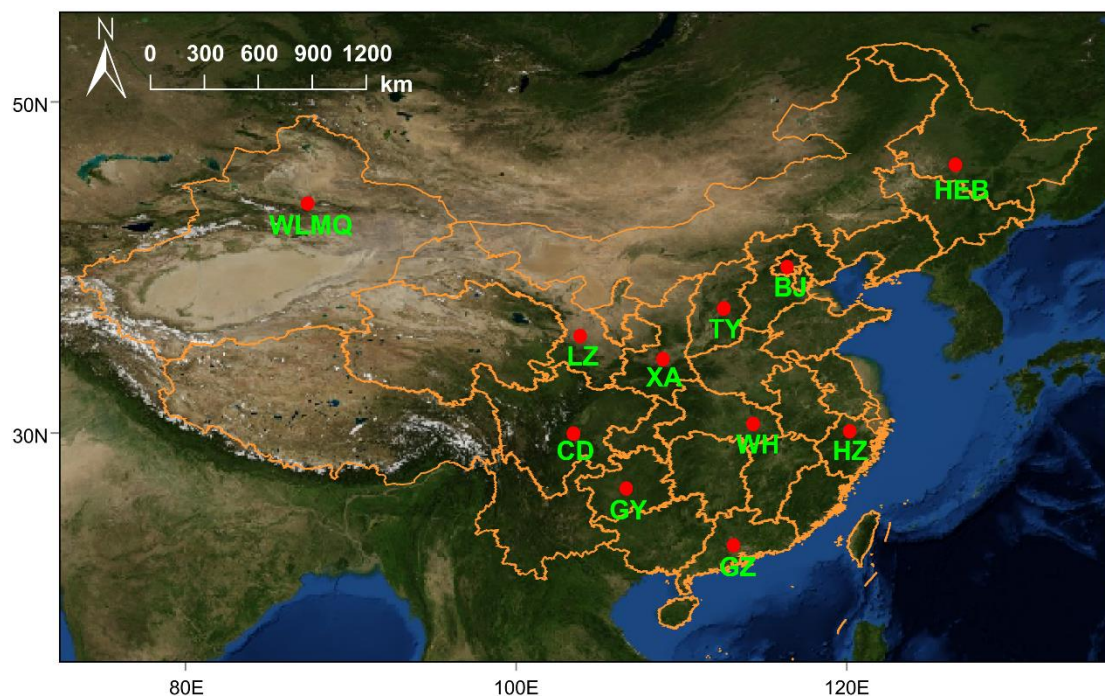

55

56 **Figure S1.** The locations of the sampling sites. The map was derived from

57 ©MeteoInfoMap (version 3.3.0) (Chinese Academy of Meteorological Sciences,

58 China).

59

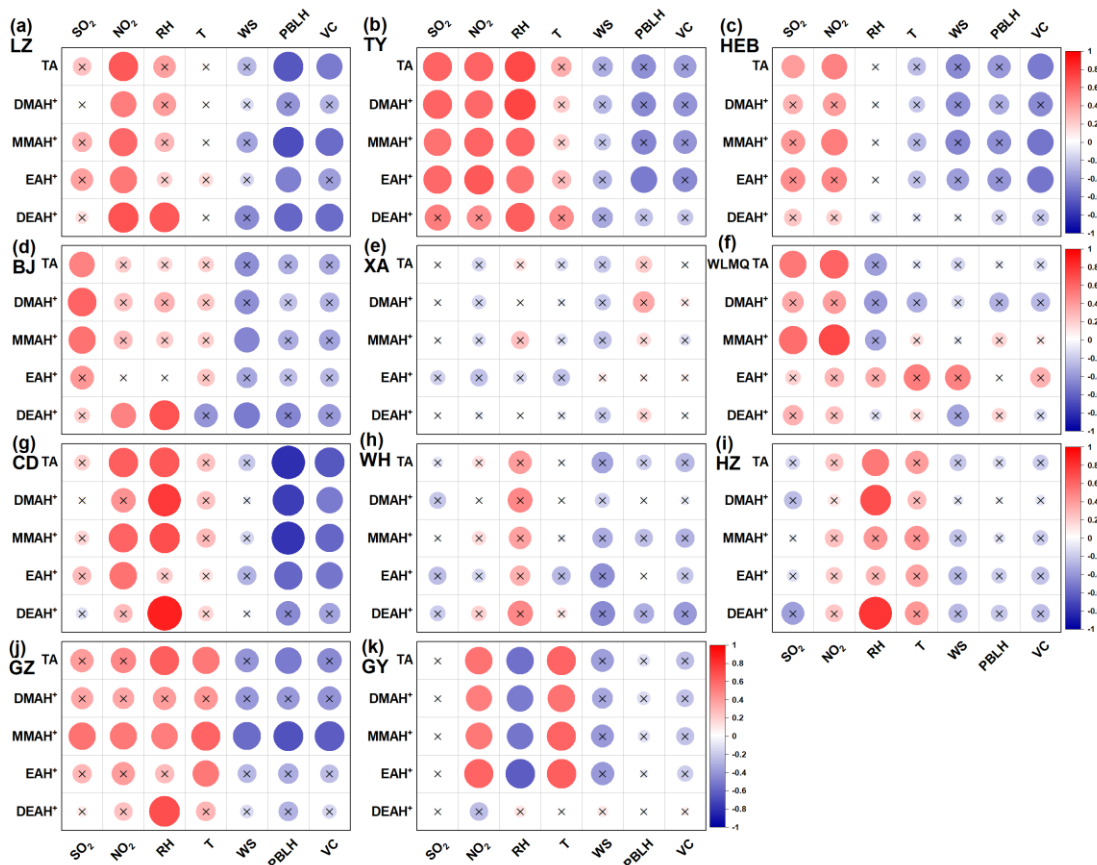

60

61 **Figure S2.** Diagrams presenting correlations between the concentrations of various

62 aminiums and other parameters at (a–k) different sites. The colors of the different

63 solid circles indicate different correlation coefficients  $r$ . The size of the solid circle

64 indicates the significance of the correlation between the two corresponding

65 parameters: the larger circle indicates that the correlation is more significant, whereas

66 the symbol “x” indicates that the  $P$ -value is greater than 0.05.

67

68

69

70

71

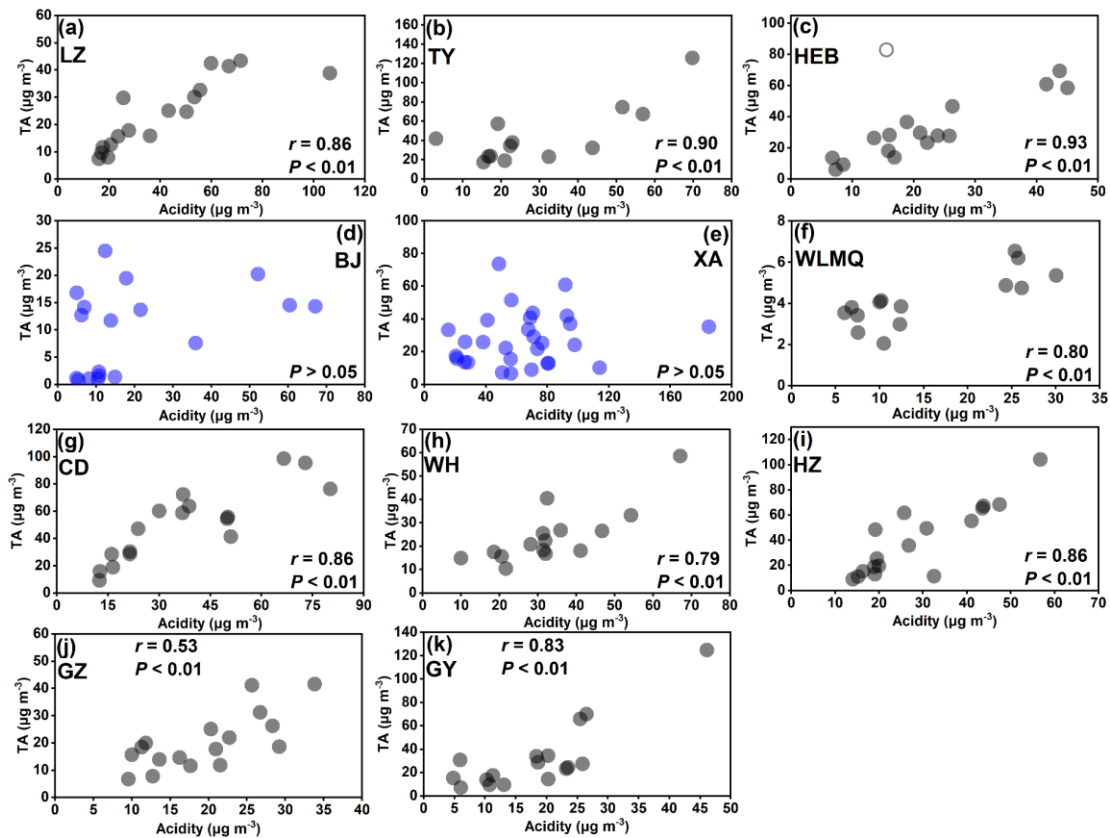

72

73 **Figure S3.** Concentration of TA as a function of acidity (expressed as  $(\text{NO}_3^- + 2\text{SO}_4^{2-})$

74  $-\text{NH}_4^+$ ) at the (a) LZ, (b) TY, (c) HEB, (d) BJ, (e) XA, (f) WLMQ, (g) CD, (h) WH,

75 (i) HZ, (j) GZ, and (k) GY sites. Open circles represent outliers.

76

77

78

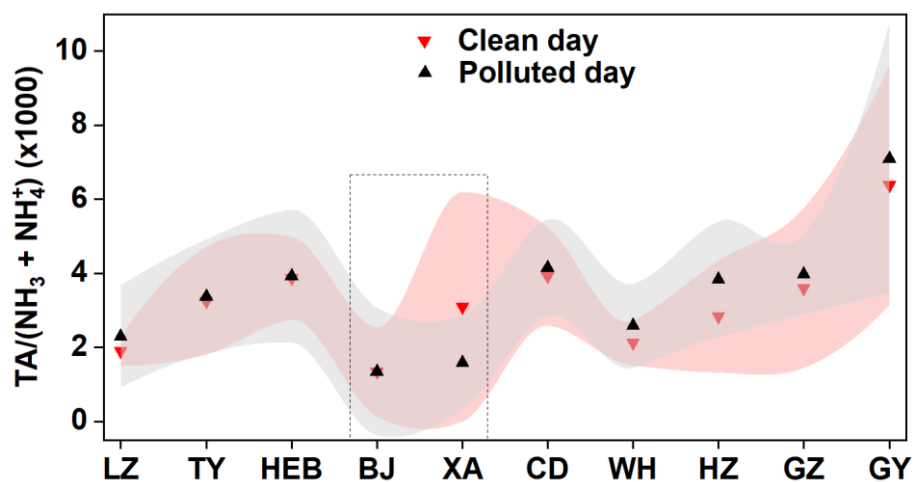

79

80 **Figure S4.** The averages of  $TA/(NH_3 + NH_4^+)$  ratios on clean and polluted days in  
 81 different cities. The triangle and the shaded area represent the mean value and the  
 82 associated standard deviation, respectively. The concentration of  $NH_3$  was predicted  
 83 using ISORROPIA-II (Guo et al., 2015).

84

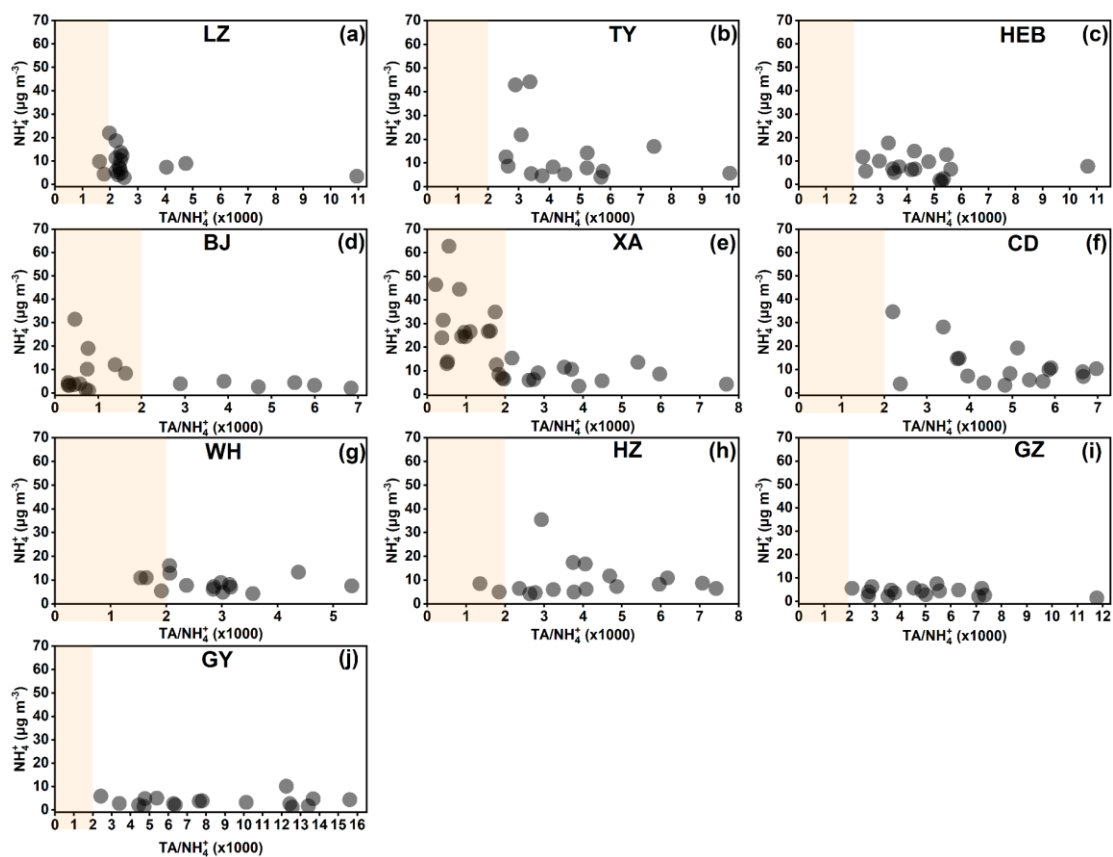

85

86 **Figure S5.** Scatterplots of the mass concentrations of  $\text{NH}_4^+$  with the ratio of TA to

87  $\text{NH}_4^+$  at the (a) LZ, (b) TY, (c) HEB, (d) BJ, (e) XA, (f) WLMQ, (g) CD, (h) WH, (i)

88 HZ, (j) GZ, and (k) GY sites.

89

90 **REFERENCES**

- 91 Akyüz, M.: Simultaneous determination of aliphatic and aromatic amines in ambient  
92 air and airborne particulate matters by gas chromatography-mass spectrometry,  
93 Atmospheric Environment, 42, 3809-3819,  
94 <https://doi.org/10.1016/j.atmosenv.2007.12.057>, 2008.
- 95 Chen, D., Yao, X., Chan, C. K., Tian, X., Chu, Y., Clegg, S. L., Shen, Y., Gao, Y., and  
96 Gao, H.: Competitive Uptake of Dimethylamine and Trimethylamine against  
97 Ammonia on Acidic Particles in Marine Atmospheres, Environmental Science  
98 & Technology, 56, 5430-5439, 10.1021/acs.est.1c08713, 2022a.
- 99 Chen, Y., Lin, Q., Li, G., and An, T.: A new method of simultaneous determination of  
100 atmospheric amines in gaseous and particulate phases by gas chromatography-  
101 mass spectrometry, J Environ Sci (China), 114, 401-411,  
102 [10.1016/j.jes.2021.09.027](https://doi.org/10.1016/j.jes.2021.09.027), 2022b.
- 103 Cheng, G., Hu, Y., Sun, M., Chen, Y., Chen, Y., Zong, C., Chen, J., and Ge, X.:  
104 Characteristics and potential source areas of aliphatic amines in PM<sub>2.5</sub> in  
105 Yangzhou, China, Atmospheric Pollution Research, 11, 296-302,  
106 <https://doi.org/10.1016/j.apr.2019.11.002>, 2020.
- 107 Choi, N. R., Lee, J. Y., Ahn, Y. G., and Kim, Y. P.: Determination of atmospheric  
108 amines at Seoul, South Korea via gas chromatography/tandem mass  
109 spectrometry, Chemosphere, 258, 127367,  
110 [10.1016/j.chemosphere.2020.127367](https://doi.org/10.1016/j.chemosphere.2020.127367), 2020.
- 111 Corral, A. F., Choi, Y., Collister, B. L., Crosbie, E., Dadashazar, H., DiGangi, J. P.,

112 Diskin, G. S., Fenn, M., Kirschler, S., Moore, R. H., Nowak, J. B., Shook, M.  
113 A., Stahl, C. T., Shingler, T., Thornhill, K. L., Voigt, C., Ziemba, L. D., and  
114 Sorooshian, A.: Dimethylamine in cloud water: a case study over the  
115 northwest Atlantic Ocean, *Environmental Science: Atmospheres*, 2, 1534-1550,  
116 10.1039/D2EA00117A, 2022.

117 Dall'Osto, M., Airs, R. L., Beale, R., Cree, C., Fitzsimons, M. F., Beddows, D.,  
118 Harrison, R. M., Ceburnis, D., O'Dowd, C., Rinaldi, M., Paglione, M., Nenes,  
119 A., Decesari, S., and Simó, R.: Simultaneous Detection of Alkylamines in the  
120 Surface Ocean and Atmosphere of the Antarctic Sympagic Environment, *ACS*  
121 *Earth and Space Chemistry*, 3, 854-862, 10.1021/acsearthspacechem.9b00028,  
122 2019.

123 Du, W., Wang, X., Yang, F., Bai, K., Wu, C., Liu, S., Wang, F., Lv, S., Chen, Y., Wang,  
124 J., Liu, W., Wang, L., Chen, X., and Wang, G.: Particulate Amines in the  
125 Background Atmosphere of the Yangtze River Delta, China: Concentration,  
126 Size Distribution, and Sources, *Advances in Atmospheric Sciences*, 38, 1128-  
127 1140, 10.1007/s00376-021-0274-0, 2021.

128 Feng, X., Wang, C., Feng, Y., Cai, J., Zhang, Y., Qi, X., Li, Q., Li, J., and Chen, Y.:  
129 Outbreaks of Ethyl-Amines during Haze Episodes in North China Plain: A  
130 Potential Source of Amines from Ethanol Gasoline Vehicle Emission,  
131 *Environmental Science & Technology Letters*, 9, 306-311,  
132 10.1021/acs.estlett.2c00145, 2022.

133 Gani, S., Bhandari, S., Seraj, S., Wang, D. S., Patel, K., Soni, P., Arub, Z., Habib, G.,

134 Hildebrandt Ruiz, L., and Apte, J. S.: Submicron aerosol composition in the  
135 world's most polluted megacity: the Delhi Aerosol Supersite study, *Atmos.*  
136 *Chem. Phys.*, 19, 6843-6859, [10.5194/acp-19-6843-2019](https://doi.org/10.5194/acp-19-6843-2019), 2019.

137 Guo, H. Y., Xu, L., Bougiatioti, A., Cerully, K. M., Capps, S. L., Hite Jr, J., Carlton,  
138 A., Lee, S. H., Bergin, M., and Ng, N.: Fine-particle water and pH in the  
139 southeastern United States, *Atmos. Chem. Phys.*, 15, 5211-5228.  
140 <https://doi.org/5210.5194/acp-5215-5211-2015>, 2015.

141 Ho, K.-F., Ho, S. S. H., Huang, R.-J., Chuang, H.-C., Cao, J.-J., Han, Y., Lui, K.-H.,  
142 Ning, Z., Chuang, K.-J., Cheng, T.-J., Lee, S.-C., Hu, D., Wang, B., and Zhang,  
143 R.: Chemical composition and bioreactivity of PM<sub>2.5</sub> during 2013 haze events  
144 in China, *Atmospheric Environment*, 126, 162-170,  
145 <https://doi.org/10.1016/j.atmosenv.2015.11.055>, 2016.

146 Ho, K. F., Ho, S. S. H., Huang, R.-J., Liu, S. X., Cao, J.-J., Zhang, T., Chuang, H.-C.,  
147 Chan, C. S., Hu, D., and Tian, L.: Characteristics of water-soluble organic  
148 nitrogen in fine particulate matter in the continental area of China,  
149 *Atmospheric Environment*, 106, 252-261,  
150 <https://doi.org/10.1016/j.atmosenv.2015.02.010>, 2015.

151 Huang, S., Song, Q., Hu, W., Yuan, B., Liu, J., Jiang, B., Li, W., Wu, C., Jiang, F.,  
152 Chen, W., Wang, X., and Shao, M.: Chemical composition and sources of  
153 amines in PM<sub>2.5</sub> in an urban site of PRD, China, *Environmental Research*,  
154 212, 113261, <https://doi.org/10.1016/j.envres.2022.113261>, 2022.

155 Huang, X., Deng, C., Zhuang, G., Lin, J., and Xiao, M.: Quantitative analysis of



156 aliphatic amines in urban aerosols based on online derivatization and high  
157 performance liquid chromatography, *Environmental Science: Processes &*  
158 *Impacts*, 18, 796-801, 10.1039/C6EM00197A, 2016.

159 Liu, F., Zhang, G., Lian, X., Fu, Y., Lin, Q., Yang, Y., Bi, X., Wang, X., Peng, P. a.,  
160 and Sheng, G.: Influence of meteorological parameters and oxidizing capacity  
161 on characteristics of airborne particulate amines in an urban area of the Pearl  
162 River Delta, China, *Environmental Research*, 212, 113212,  
163 <https://doi.org/10.1016/j.envres.2022.113212>, 2022a.

164 Liu, F., Bi, X., Zhang, G., Lian, X., Fu, Y., Yang, Y., Lin, Q., Jiang, F., Wang, X., Peng,  
165 P. a., and Sheng, G.: Gas-to-particle partitioning of atmospheric amines  
166 observed at a mountain site in southern China, *Atmospheric Environment*, 195,  
167 1-11, <https://doi.org/10.1016/j.atmosenv.2018.09.038>, 2018.

168 Liu, T., Xu, Y., Sun, Q.-B., Xiao, H.-W., Zhu, R.-G., Li, C.-X., Li, Z.-Y., Zhang, K.-Q.,  
169 Sun, C.-X., and Xiao, H.-Y.: Characteristics, Origins, and Atmospheric  
170 Processes of Amines in Fine Aerosol Particles in Winter in China, *J. Geophys.*  
171 *Res.: Atmos.*, 128, e2023JD038974, <https://doi.org/10.1029/2023JD038974>,  
172 2023.

173 Liu, Z., Li, M., Wang, X., Liang, Y., Jiang, Y., Chen, J., Mu, J., Zhu, Y., Meng, H.,  
174 Yang, L., Hou, K., Wang, Y., and Xue, L.: Large contributions of  
175 anthropogenic sources to amines in fine particles at a coastal area in northern  
176 China in winter, *Science of The Total Environment*, 839, 156281,  
177 <https://doi.org/10.1016/j.scitotenv.2022.156281>, 2022b.

178 Shen, W., Ren, L., Zhao, Y., Zhou, L., Dai, L., Ge, X., Kong, S., Yan, Q., Xu, H.,  
179 Jiang, Y., He, J., Chen, M., and Yu, H.: C1-C2 alkyl aminiums in urban  
180 aerosols: Insights from ambient and fuel combustion emission measurements  
181 in the Yangtze River Delta region of China, *Environmental pollution*, 230, 12-  
182 21, <https://doi.org/10.1016/j.envpol.2017.06.034>, 2017.

183 Shu, Q., Pei, C., Lin, X., Hong, D., Lai, S., and Zhang, Y.: Variations of aminiums in  
184 fine particles at a suburban site in Guangzhou, China: Importance of  
185 anthropogenic and natural emissions, *Particuology*, 80, 140-147,  
186 <https://doi.org/10.1016/j.partic.2022.11.019>, 2023.

187 Tao, Y., Ye, X., Jiang, S., Yang, X., Chen, J., Xie, Y., and Wang, R.: Effects of amines  
188 on particle growth observed in new particle formation events, *Journal of*  
189 *Geophysical Research: Atmospheres*, 121, 324-335,  
190 <https://doi.org/10.1002/2015JD024245>, 2016.

191 VandenBoer, T. C., Markovic, M. Z., Petroff, A., Czar, M. F., Borduas, N., and  
192 Murphy, J. G.: Ion chromatographic separation and quantitation of alkyl  
193 methylamines and ethylamines in atmospheric gas and particulate matter using  
194 preconcentration and suppressed conductivity detection, *J Chromatogr A*, 1252,  
195 74-83, [10.1016/j.chroma.2012.06.062](https://doi.org/10.1016/j.chroma.2012.06.062), 2012.

196 Wang, M., Wang, Q., Ho, S. S. H., Li, H., Zhang, R., Ran, W., Qu, L., Lee, S. C., and  
197 Cao, J.: Chemical characteristics and sources of nitrogen-containing organic  
198 compounds at a regional site in the North China Plain during the transition  
199 period of autumn and winter, *Sci Total Environ*, 812, 151451,

200 10.1016/j.scitotenv.2021.151451, 2022.

201 Yang, H., Yu, J. Z., Ho, S. S. H., Xu, J., Wu, W.-S., Wan, C. H., Wang, X., Wang, X.,  
202 and Wang, L.: The chemical composition of inorganic and carbonaceous  
203 materials in PM<sub>2.5</sub> in Nanjing, China, *Atmospheric Environment*, 39, 3735-  
204 3749, <https://doi.org/10.1016/j.atmosenv.2005.03.010>, 2005.

205 Yang, X.-Y., Cao, F., Fan, M.-Y., Lin, Y.-C., Xie, F., and Zhang, Y.-L.: Seasonal  
206 variations of low molecular alkyl amines in PM<sub>2.5</sub> in a North China Plain  
207 industrial city: Importance of secondary formation and combustion emissions,  
208 *Science of The Total Environment*, 857, 159371,  
209 <https://doi.org/10.1016/j.scitotenv.2022.159371>, 2023.

210 Zhou, S., Li, H., Yang, T., Chen, Y., Deng, C., Gao, Y., Chen, C., and Xu, J.:  
211 Characteristics and sources of aerosol aminiums over the eastern coast of  
212 China: insights from the integrated observations in a coastal city, adjacent  
213 island and surrounding marginal seas, *Atmospheric Chemistry and Physics*, 19,  
214 10447-10467, 10.5194/acp-19-10447-2019, 2019.

215
